# Supplementary material
Source: PubMed Central journal article supplement (PMC5855021)
Supplement: blood811224-suppl1.pdf [file blood811224-suppl1.pdf]

**Supplemental Tables****Table S1. Best clinical response subset analyses (all treated patients, n=61)**

| Response            | Disease status relative to frontline treatment |                 | Refractory status to frontline treatment         |                                                   | Remission duration after frontline treatment |                                    |
|---------------------|------------------------------------------------|-----------------|--------------------------------------------------|---------------------------------------------------|----------------------------------------------|------------------------------------|
|                     | Primary refractory (N=27)                      | Relapsed (N=34) | Primary refractory (N=27)                        |                                                   | Relapsed (N=34)                              |                                    |
|                     | n (%)                                          | n (%)           | 1 <sup>st</sup> line PR or SD<br>(N=10)<br>n (%) | PD at 1 <sup>st</sup> line EOT<br>(N=17)<br>n (%) | Relapse >1 year<br>(N=15)<br>n (%)           | Relapse ≤1 year<br>(N=19)<br>n (%) |
| Objective Response  | 18 (67)                                        | 32 (94)         | 8 (80)                                           | 10 (59)                                           | 13 (87)                                      | 19 (100)                           |
| Complete response   | 13 (48)                                        | 24 (71)         | 7 (70)                                           | 6 (35)                                            | 11 (73)                                      | 13 (68)                            |
| Partial response    | 5 (19)                                         | 8 (24)          | 1 (10)                                           | 4 (24)                                            | 2 (13)                                       | 6 (32)                             |
| Stable disease      | 3 (11)                                         | 2 (6)           | 1 (10)                                           | 1 (6)                                             | 2 (13)                                       | 0                                  |
| Progressive disease | 5 (19)                                         | 0               | 1 (10)                                           | 4 (24)                                            | 0                                            | 0                                  |
| Not evaluable       | 1 (4)                                          | 0               | 0                                                | 1 (6)                                             | 0                                            | 0                                  |

Abbreviations: EOT, end of treatment; PR, partial response; SD, stable disease

| Response            | Age                       |                          | Disease stage at initial diagnosis |                        | Potential IrAEs (excluding IRRs) |                         |
|---------------------|---------------------------|--------------------------|------------------------------------|------------------------|----------------------------------|-------------------------|
|                     | <65 years (N=57)<br>n (%) | ≥65 years (N=4)<br>n (%) | I-II (N=36)<br>n (%)               | III-IV (N=24)<br>n (%) | IrAE (N=51)<br>n (%)             | No IrAE (N=10)<br>n (%) |
| Objective Response  | 46 (81)                   | 4 (100)                  | 30 (83)                            | 19 (79)                | 45 (88)                          | 5 (50)                  |
| Complete response   | 36 (63)                   | 1 (25)                   | 25 (69)                            | 11 (46)                | 34 (67)                          | 3 (30)                  |
| Partial response    | 10 (18)                   | 3 (75)                   | 5 (14)                             | 8 (33)                 | 11 (22)                          | 2 (20)                  |
| Stable disease      | 5 (9)                     | 0                        | 5 (14)                             | 0                      | 4 (8)                            | 1 (10)                  |
| Progressive disease | 5 (9)                     | 0                        | 1 (3)                              | 4 (17)                 | 2 (4)                            | 3 (30)                  |
| Not evaluable       | 1 (2)                     | 0                        | 1 (4)                              | 0                      | 0                                | 1 (10)                  |

Abbreviations: IrAE, immune related adverse event; IRR, infusion-related reaction

**Table S2. Best clinical response subset analyses (efficacy evaluable patients, n=60)**

| Response            | Disease status relative to frontline treatment |                                                  | Refractory status to frontline treatment          |                                     | Remission duration after frontline treatment |          |
|---------------------|------------------------------------------------|--------------------------------------------------|---------------------------------------------------|-------------------------------------|----------------------------------------------|----------|
|                     | Primary refractory (N=26)<br>n (%)             | Relapsed (N=34)<br>n (%)                         | Primary refractory (N=26)                         |                                     | Relapsed (N=34)                              |          |
|                     |                                                | 1 <sup>st</sup> line PR or SD<br>(N=10)<br>n (%) | PD at 1 <sup>st</sup> line EOT<br>(N=16)<br>n (%) | Relapsed >1 year<br>(N=15)<br>n (%) | Relapsed ≤1 year<br>(N=19)<br>n (%)          |          |
| Objective Response  | 18 (69)                                        | 32 (94)                                          | 8 (80)                                            | 10 (63)                             | 13 (87)                                      | 19 (100) |
| Complete response   | 13 (50)                                        | 24 (71)                                          | 7 (70)                                            | 6 (38)                              | 11 (73)                                      | 13 (68)  |
| Partial response    | 5 (19)                                         | 8 (24)                                           | 1 (10)                                            | 4 (25)                              | 2 (13)                                       | 6 (32)   |
| Stable disease      | 3 (12)                                         | 2 (6)                                            | 1 (10)                                            | 1 (6)                               | 2 (13)                                       | 0        |
| Progressive disease | 5 (19)                                         | 0                                                | 1 (10)                                            | 5 (31)                              | 0                                            | 0        |

Abbreviations: EOT, end of treatment; PR, partial response; SD, stable disease

| Response            | Age                       |                          | Disease stage at initial diagnosis |                        | Potential IrAEs (excluding IRRs) |                        |
|---------------------|---------------------------|--------------------------|------------------------------------|------------------------|----------------------------------|------------------------|
|                     | <65 years (N=56)<br>n (%) | ≥65 years (N=4)<br>n (%) | I-II (N=36)<br>n (%)               | III-IV (N=23)<br>n (%) | IrAE (N=51)<br>n (%)             | No IrAE (N=9)<br>n (%) |
| Objective Response  | 46 (82)                   | 4 (100)                  | 30 (83)                            | 19 (83)                | 49 (89)                          | 1 (20)                 |
| Complete response   | 36 (64)                   | 1 (25)                   | 25 (69)                            | 11 (48)                | 34 (67)                          | 3 (33)                 |
| Partial response    | 10 (18)                   | 3 (75)                   | 5 (14)                             | 8 (35)                 | 11 (22)                          | 2 (22)                 |
| Stable disease      | 5 (9)                     | 0                        | 5 (14)                             | 0                      | 4 (8)                            | 1 (11)                 |
| Progressive disease | 5 (9)                     | 0                        | 1 (3)                              | 4 (17)                 | 2 (4)                            | 3 (33)                 |

Abbreviations: IrAE, immune related adverse event; IRR, infusion-related reaction

**Table S3. Subsequent Salvage Regimens after EOT (n=17)**

| Subject | Best response at EOT | Salvage therapy                                            | Best response after salvage therapy | Received ASCT | Best response after ASCT |
|---------|----------------------|------------------------------------------------------------|-------------------------------------|---------------|--------------------------|
| 1       | PD                   | ICE x2                                                     | PR                                  | Y             | NE                       |
| 2       | PD                   | ICE x2                                                     | PD                                  | N             | -                        |
| 2       | PD                   | Vinblastine                                                | PD                                  | N             | -                        |
| 2       | PD                   | Gemcitabine, navelbine, dioxin                             | NE                                  | N             | -                        |
| 3       | PD                   | ICE                                                        | CR                                  | Y             | CR                       |
| 4       | CR                   | Gemcitabine, vinorelbine, bendamustine                     | CR                                  | Y             | -                        |
| 5       | CR                   | Bendamustine                                               | CR                                  | N             | CR                       |
| 5       | CR                   | Brentuximab vedotin                                        | CR                                  | Y             | CR                       |
| 6       | PR                   | ICE                                                        | PR                                  | Y             | -                        |
| 7       | SD                   | ICE, etoposide, ifosfamide, mesna, carboplatin, filgrastim | PR                                  | Y             | PR                       |
| 8       | PR                   | ICE                                                        | CR                                  | Y             | CR                       |
| 9       | SD                   | ICE                                                        | CR                                  | Y             | NE                       |
| 10      | PR                   | ICE                                                        | CR                                  | Y             | CR                       |
| 11      | PR                   | Nivolumab                                                  | PR                                  | N             | -                        |
| 12      | PR                   | Gemcitabine, oxaliplatin                                   | CR                                  | N             | -                        |
| 13      | PR                   | Carboplatin, gemcitabine, decadron                         | NE                                  | Y             | PR                       |
| 13      | PR                   | Gemcitabine, oxaliplatin                                   | PD                                  | Y             | PR                       |
| 13      | PR                   | Brentuximab vedotin                                        | NE                                  | Y             | PR                       |
| 13      | PR                   | ICE                                                        | PR                                  | Y             | PR                       |
| 14      | PD                   | Bendamustine                                               | PD                                  | N             | -                        |
| 14      | PD                   | ICE                                                        | PD                                  | N             | -                        |
| 14      | PD                   | cyclophosphamide, vincristine, procarbazine, prednisone    | PD                                  | N             | -                        |
| 14      | PD                   | Dexamethasone                                              | NE                                  | N             | -                        |
| 14      | PD                   | Gemcitabine, vinorelbine, doxorubicin                      |                                     | N             | -                        |
| 15      | SD                   | Brentuximab vedotin                                        | NE                                  | Y             | -                        |
| 16      | PD                   | ICE                                                        | PR                                  | N             | -                        |
| 17      | SD                   | ICE                                                        | CR                                  | Y             | CR                       |

Abbreviations: ASCT, autologous stem cell transplant; ICE, ifosfamide, carboplatin, etoposide; CR, complete response; EOT, end of treatment; NE, not evaluable; PD, progressive disease; PR, partial response; SD, stable disease

**Table S4. Infusion-related reactions (n=61)**

|         | BV<br>n (%) | Nivo<br>n (%) |
|---------|-------------|---------------|
| Cycle 1 |             |               |
| Grade 1 | 5 (8)       | 0             |
| Grade 2 | 0           | 4 (7)         |
| Grade 3 | 0           | 0             |
| Cycle 2 |             |               |
| Grade 1 | 5 (8)       | 1 (2)         |
| Grade 2 | 14 (23)     | 2 (3)         |
| Grade 3 | 2 (3)       | 0             |
| Cycle 3 |             |               |
| Grade 1 | 1 (2)       | 0             |
| Grade 2 | 5 (8)       | 0             |
| Grade 3 | 0           | 0             |
| Cycle 4 |             |               |
| Grade 1 | 0           | 0             |
| Grade 2 | 2 (3)       | 0             |
| Grade 3 | 0           | 0             |

Abbreviations: BV, brentuximab vedotin; Nivo, nivolumab

More than one IRR may be reported for a single dose, Grade is the maximum grade of IRR reported for a dose.
